# Supplementary material
Source: PubMed Central journal article supplement (PMC384811)
Supplement: pnas_101_13_4706__1.pdf [file pnas_101_13_4706__1.pdf]

Table 3: Gene-specific primers used in Northern analysis

| Gene             | 5' primer                      | 3' primer                     |
|------------------|--------------------------------|-------------------------------|
| <i>KCS1</i>      | TCAAAGCAAACCCTAATTCTTACGCTG    | TTACATATATGATTATCCGGTTCAACC   |
| <i>CUT1/CER6</i> | TCACATTTTGTAACAATAATACAATTATAC | CGTTACTAAACCGTTCAAAGACGTTTTAG |
| <i>FDH</i>       | ACAAACATCACTACCTTAGGTCCTCTTG   | GAAGCTGAACAGGACTCTAGCCACATCC  |
| <i>CER2</i>      | TACCTTCTCGCCACTCGTTTTCTCCAG    | CAGTTCAAACAATTTATTGATAGGCTCC  |
| <i>CER3</i>      | TCTACTCCTAGGAAGCTTCATGAAGAGTC  | ATGTAAGACGGCTCCAATTGTGGTTGG   |
| <i>WIN1</i>      | ATGGTACAGACGAAGAAGTTCAGAGGTGT  | TGCAAAGCAACCTTTTCTTCCTCATCCA  |
| <i>ACT1</i>      | AGAGATTCAGATGCCCAGAAGTCTTGTTCC | AACGATTCTGGACCTGCCTCATCATACTC |
