# Supplementary material
Source: PubMed Central journal article supplement (PMC384811)

```

At5g11190 -----
At5g25390 -----
At1g15340 -----
At5g25190 -----
At1g22190 -----
At1g36060 -----
At4g11140 -----
At5g5290 -----
At2g20880 -----
At4g13420 -----
ruler 1.....10.....20.....30.....40.....50.....60.....70.....80.....90.....100.....110.....120.....130.....140.....150

At5g11190 -----
At5g25390 -----
At1g15340 -----
At5g25190 -----
At1g22190 -----
At1g36060 -----
At4g11140 -----
At5g5290 -----
At2g20880 -----
At4g13420 -----
ruler .....160.....170.....180.....190.....200.....210.....220.....230.....240.....250.....260.....270.....280.....290.....300

At5g11190 -----
At5g25390 -----
At1g15340 -----
At5g25190 -----
At1g22190 -----
At1g36060 -----
At4g11140 -----
At5g5290 -----
At2g20880 -----
At4g13420 -----
ruler .....310.....320.....330.....340.....350.....360.....370.....380.....390.....400.....410.....420.....430.....440.....450

At5g11190 MHHIKLIDMS----- 189
At5g25390 MHHIKLIDMS----- 189
At1g15340 LQHILIDMS----- 189
At5g25190 MHHIKLIDMS----- 189
At1g22190 MHHIKLIDMS----- 261
At1g36060 MHHIKLIDMS----- 314
At4g11140 MHHIKLIDMS----- 287
At5g5290 MHHIKLIDMS----- 354
At2g20880 MHHIKLIDMS----- 316
At4g13420 MHHIKLIDMS----- 388
ruler .....460.....470....

```

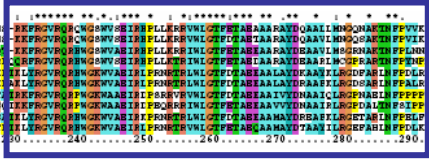

Supplement: pnas_101_13_4706__8.pdf [file pnas_101_13_4706__8.pdf]
