# Supplementary material
Source: PubMed Central journal article supplement (PMC384811)
Supplement: pnas_101_13_4706__9.pdf [file pnas_101_13_4706__9.pdf]

Table 9: Gene expression changes in WIN overexpressors: most significantly upregulated or downregulated genes in two overexpressing lines

| Affymetrix Sequence Code    | Chromosome Locus | Annotation                                                 | Fold change vs control line 13 | Fold change vs control line 22 | Probable functional association |
|-----------------------------|------------------|------------------------------------------------------------|--------------------------------|--------------------------------|---------------------------------|
| <b>Up-regulated genes</b>   |                  |                                                            |                                |                                |                                 |
| 12513_at                    | AT1G15360        | ethylene responsive element binding factor 2 (ERF2) - WIN1 | 100                            | 100                            |                                 |
| 18809_at                    | AT1G05310        | pectinesterase family                                      | 5.29                           | 11.65                          | cell wall metabolism            |
| 15145_s_at                  | AT1G02205        | CER1protein                                                | 3.63                           | 10                             | wax biosynthesis                |
| 13977_at                    | AT2G41540        | glycerol-3-phosphate dehydrogenase                         | 7.33                           | 8.22                           | lipid metabolism                |
| 16279_at                    | AT2G04570        | GDSL-motif lipase/hydrolase protein                        | 13.67                          | 7.78                           | lipid metabolism                |
| 17386_at                    | AT2G21140        | proline-rich protein family                                | 5.96                           | 7.14                           |                                 |
| 19577_at                    | AT1G65400        | disease resistance protein (TIR class), putative           | 4.37                           | 6.8                            | disease                         |
| 18876_at                    | AT2G39980        | transferase family                                         | 3.66                           | 6.31                           |                                 |
| 13956_at                    | AT2G38110        | phospholipid/glycerol acyltransferase family               | 3.25                           | 6.19                           | lipid metabolism                |
| 19365_s_at                  | AT4G39330        | aromatic alcohol:NADP+ oxidoreductase                      | 3.48                           | 4.57                           | disease                         |
| 13577_s_at                  | AT4G24510        | CER2                                                       | 2.09                           | 4.23                           | wax biosynthesis                |
| 15341_at                    | AT2G32200        | hypothetical protein                                       | 2.31                           | 4.14                           | wax biosynthesis                |
| 19892_at                    | AT2G38870        | protease inhibitor -related                                | 2.68                           | 4.14                           | disease                         |
| 13296_at                    | AT3G15540        | auxin-responsive protein IAA19                             | 2.63                           | 3.88                           | auxin response                  |
| 17961_at                    | AT1G01120        | fatty acid elongase 3-ketoacyl-CoA synthase 1 (KCS1)       | 3.71                           | 3.62                           | wax biosynthesis                |
| 17449_at                    | AT4G14440        | enoyl-CoA hydratase/isomerase family                       | 3.44                           | 3.28                           | lipid metabolism                |
| 13916_at                    | AT2G19800        | expressed protein                                          | 2.34                           | 3.05                           |                                 |
| 17119_s_at                  | At2G06050        | 12-oxophytodienoate reductase (OPR3)(DDE1)                 | 2.12                           | 2.98                           | disease                         |
| <b>Down-regulated genes</b> |                  |                                                            |                                |                                |                                 |
| 20344_at                    | AT2G15090        | fatty acid elongase 1 (FAE1), putative                     | -3.75                          | -20.89                         | wax biosynthesis                |
| 12239_at                    | AT4G29020        | putative glycine-rich protein 5                            | -7.78                          | -10.01                         |                                 |
| 12998_at                    | AT3G47800        | aldose 1-epimerase family                                  | -2.77                          | -8.81                          | carbohydrate metabolism         |
| 16137_s_at                  | AT2G02950        | phytochrome kinase substrate 1 (PKS1)                      | -2.74                          | -6.96                          | light response                  |
| 12574_at                    | AT3G60140        | pectinacetyltransferase family                             | -7.55                          | -5.44                          | cell wall metabolism            |
| 12916_at                    | AT1G19670        | coronatine-induced protein 1 (COR1)                        | -2.04                          | -3.86                          | disease                         |
| 17342_at                    | AT1G77210        | sugar transporter, putative                                | -2.06                          | -3.57                          | carbohydrate metabolism         |
| 18533_at                    | AT5G65730        | xyloglucan endotransglycosylase, putative                  | -2.59                          | -3.47                          | cell wall metabolism            |
| 17840_at                    | AT2G43570        | glycosyl hydrolase family 19 (chitinase)                   | -2.1                           | -2.96                          | disease                         |
| 15058_s_at                  | AT4G37980        | putative cinnamyl-alcohol dehydrogenase EL13-1             | -2.95                          | -2.63                          | disease                         |
| 14635_s_at                  | AT2G14610        | pathogenesis-related protein 1 (PR-1)                      | -3.12                          | -2.07                          | disease                         |
